# Supplementary material
Source: PubMed Central journal article supplement (PMC1635402)

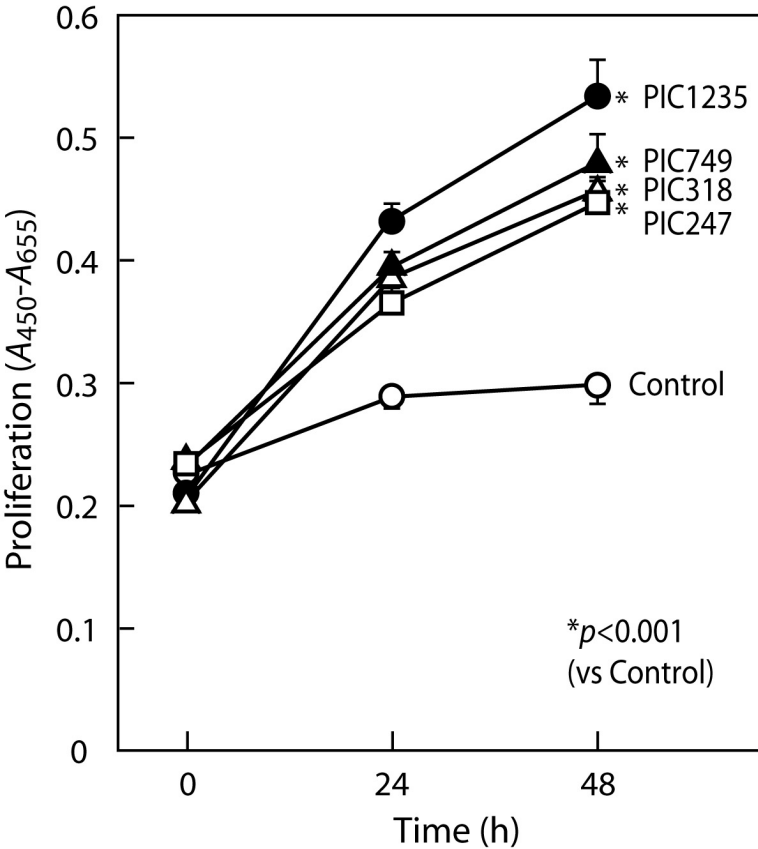

Figure S1 (Okahara et al)

Supplement: mbc_E06-04-0301_1.pdf [file mbc_E06-04-0301_1.pdf]

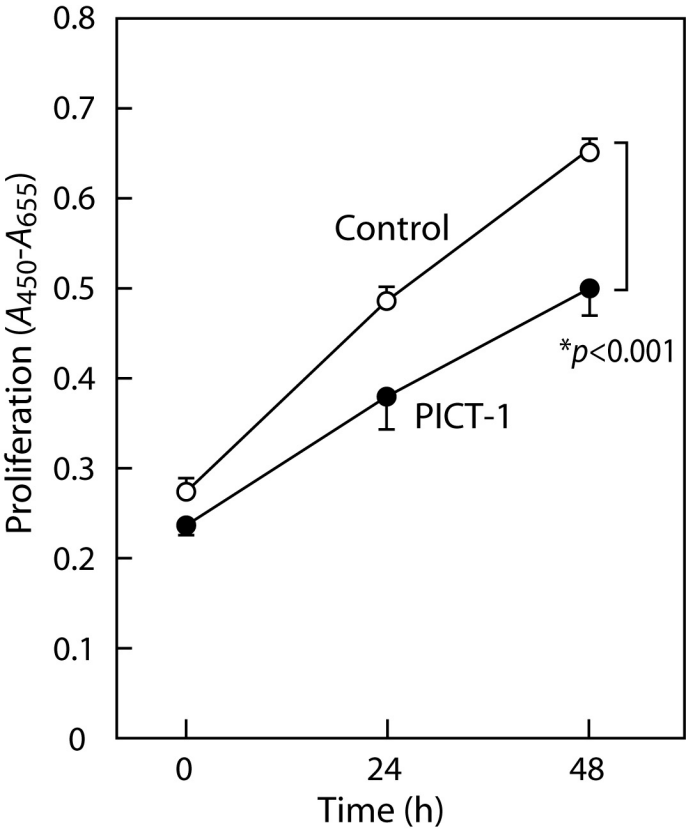

Figure S2 (Okahara et al)

Supplement: mbc_E06-04-0301_2.pdf [file mbc_E06-04-0301_2.pdf]

A

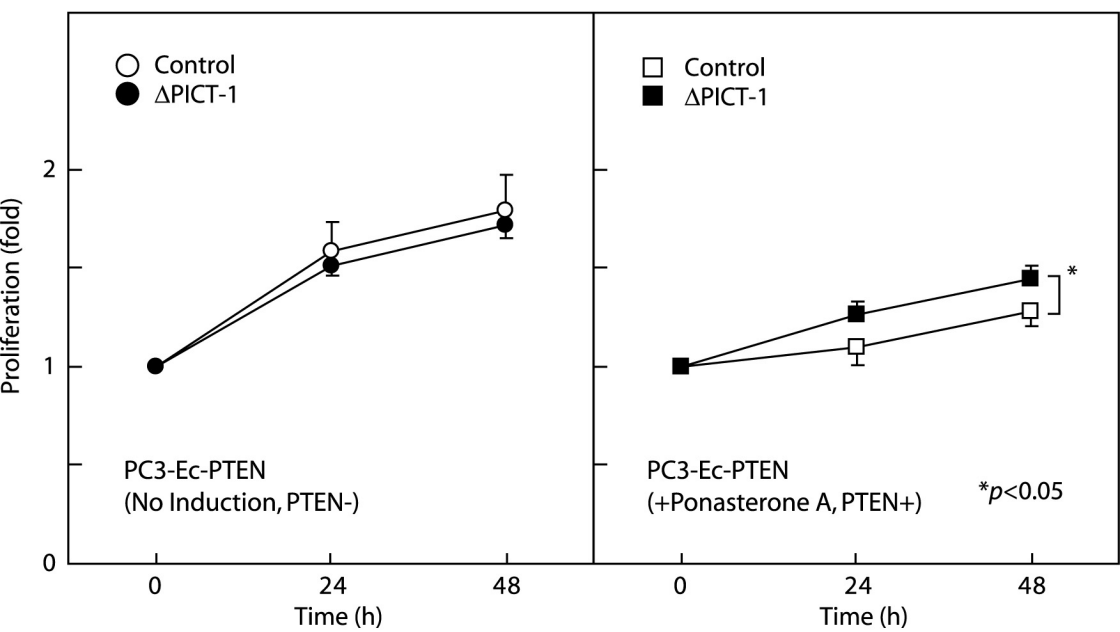

B

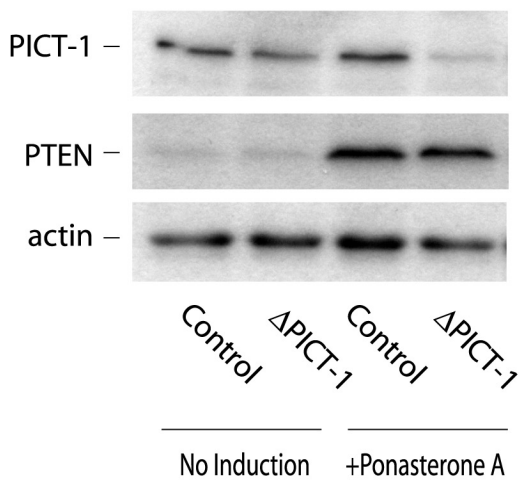

Figure S3 (Okahara et al)

Supplement: mbc_E06-04-0301_3.pdf [file mbc_E06-04-0301_3.pdf]

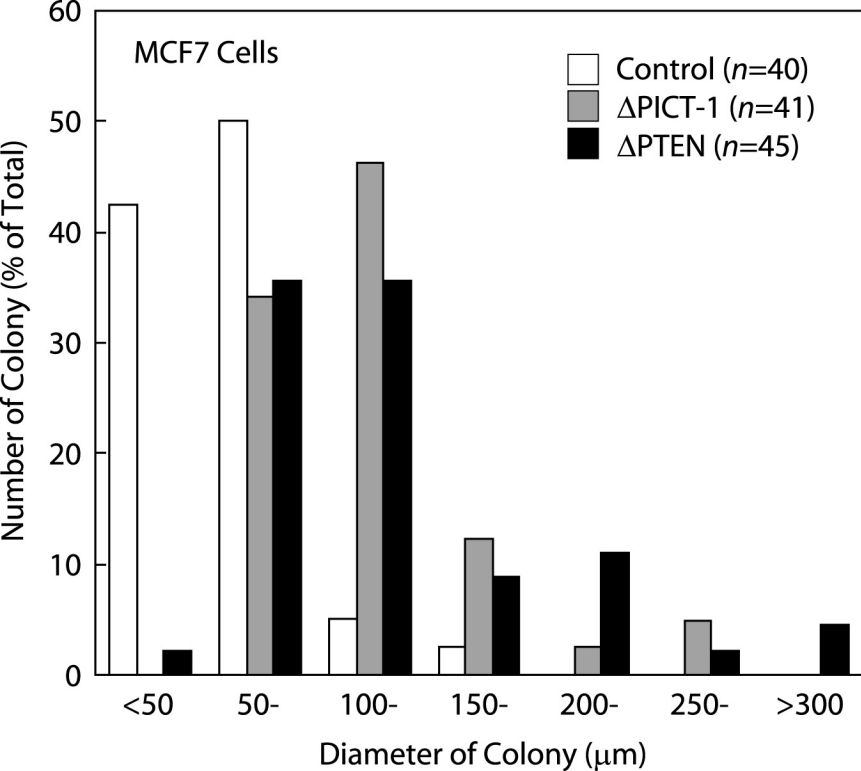

Figure S4 (Okahara et al)

Supplement: mbc_E06-04-0301_4.pdf [file mbc_E06-04-0301_4.pdf]
